# Supplementary material
Source: PubMed Central journal article supplement (PMC4824238)
Supplement: SD10.pdf [file SD10.pdf]

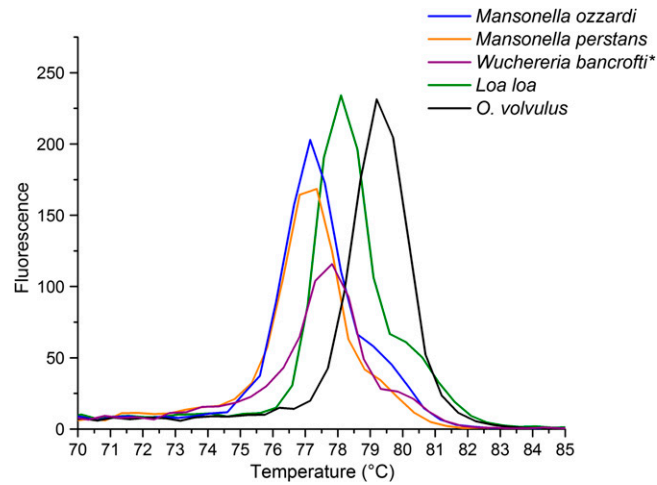

SUPPLEMENTAL FIGURE 1. Representative melt curves from filarial species potentially coendemic with *Onchocerca volvulus*—either in the Americas (*Mansonella ozzardi*) or in Africa—and demonstrating the genus-level differentiation obtained by real-time polymerase chain reaction with melt curve analysis (qPCR-MCA). Data are preliminary, as both geographical and numerical representation of all species but *O. volvulus* are limited, and may not account for natural intraspecific variation in the internal transcribed spacer 1. Moreover, all melt curves were derived from reactions amplifying a single species and may not reflect results in the presence of mixed species DNA. All specimens originated from biological materials (e.g., whole blood or used rapid diagnostic test strips) with the exception of *Wuchereria bancrofti\**, which was provided as whole-genome amplified DNA product.
